# Supplementary material for: Salivary Vasopressin as a Potential Non–Invasive Biomarker of Anxiety in Dogs Diagnosed with Separation–Related Problems
Source: MDPI journal article supplement (doi:10.3390/ani9121033), 2019-11-26

**Table S1** Main characteristics of the dogs involved in the study.

| Dog_ID | Owner_gender | Dog_Age<br>(years) | Breed | Dog_Gender | Sexual_status | Dog_source      | Separation_distress |
|--------|--------------|--------------------|-------|------------|---------------|-----------------|---------------------|
| 1      | male         | 2,0                | mixed | male       | intact        | shelter         | YES                 |
| 2      | female       | 4,0                | pure  | female     | desexed       | breeder         | YES                 |
| 3      | female       | 5,0                | pure  | female     | intact        | shelter         | YES                 |
| 4      | female       | 2,0                | pure  | female     | intact        | breeder         | YES                 |
| 5      | female       | 3,0                | mixed | male       | desexed       | found           | YES                 |
| 6      | male         | 2,0                | mixed | female     | desexed       | found           | YES                 |
| 7      | female       | 2,0                | mixed | male       | intact        | found           | YES                 |
| 8      | male         | 2,5                | mixed | female     | desexed       | friend/relative | YES                 |
| 9      | male         | 2,0                | mixed | female     | intact        | found           | YES                 |
| 10     | female       | 4,0                | pure  | male       | intact        | breeder         | YES                 |
| 11     | male         | 1,5                | pure  | male       | intact        | breeder         | YES                 |
| 12     | female       | 2,0                | mixed | male       | desexed       | found           | YES                 |
| 13     | female       | 1,5                | mixed | female     | intact        | shelter         | YES                 |
| 14     | male         | 5,0                | pure  | male       | desexed       | friend/relative | NO                  |
| 15     | male         | 1,0                | pure  | female     | intact        | breeder         | NO                  |
| 16     | male         | 6,0                | mixed | male       | desexed       | friend/relative | NO                  |
| 17     | female       | 8,0                | mixed | female     | desexed       | found           | NO                  |
| 18     | female       | 4,0                | mixed | male       | intact        | found           | NO                  |
| 19     | female       | 5,0                | pure  | female     | intact        | breeder         | NO                  |
| 20     | male         | 2,0                | mixed | male       | intact        | found           | NO                  |
| 21     | female       | 5,0                | pure  | male       | desexed       | shelter         | NO                  |
| 22     | female       | 6,0                | mixed | male       | desexed       | friend/relative | NO                  |
| 23     | female       | 8,0                | mixed | male       | desexed       | found           | NO                  |
| 24     | female       | 8,0                | mixed | female     | desexed       | found           | NO                  |
| 25     | male         | 2,0                | pure  | male       | intact        | breeder         | NO                  |
| 26     | female       | 2,0                | mixed | female     | intact        | found           | NO                  |

**Figure S1.** A photo of a dog from the Case group who is standing by the fence during the 3-min separation phase (T1). Photo by Valentina Sammartano.

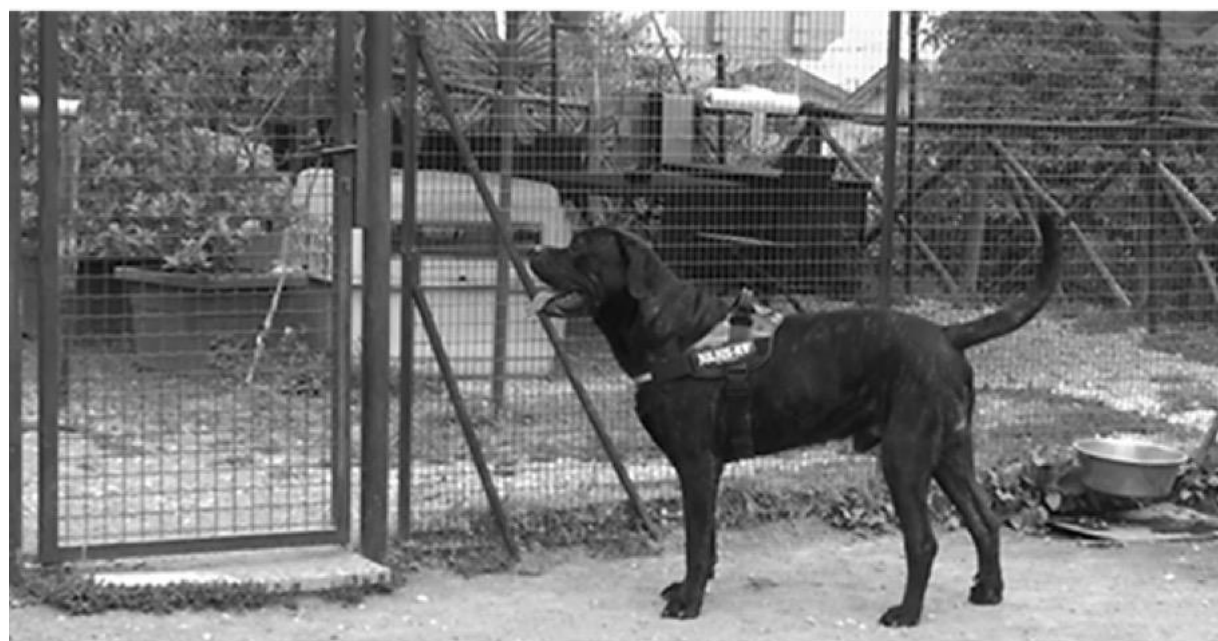

Supplement: s1 [file s1]
